# Supplementary material
Source: publisher figshare collection journal article supplement (https://acs.figshare.com/ndownloader/files/25884021)
Supplement: Supplementary file 1 [file 25884021]

Supporting Information for:

High Frequency Fe–H and Fe–H<sub>2</sub> Modes in a *trans*-Fe( $\eta^2$ -H<sub>2</sub>)(H) Complex  
– A Speed Record for Nuclear Resonance Vibrational Spectroscopy

This archive folder contains animated GIF files for the normal modes containing

**Fe ligand H(+H<sub>2</sub>) nuclei PVDOS > 10%** character for the DFT models **1<sub>H</sub><sup>H2</sup>**, **1<sub>H</sub>**, **1<sub>H</sub><sup>N2</sup>** and

**Fe ligand D(+D<sub>2</sub>) nuclei PVDOS > 10%** character for the DFT models **1<sub>D</sub><sup>D2</sup>**, **1<sub>D</sub>**, **1<sub>D</sub><sup>N2</sup>**.

The filename nomenclature for the **1<sub>x</sub><sup>y</sup>** model normal mode calculated at **z** cm<sup>-1</sup> is  
**1\_<sub>x</sub><sup>y</sup>\_z\_cm-1.gif**
