# Supplementary material
Source: publisher figshare collection journal article supplement (https://acs.figshare.com/ndownloader/files/25884021)
Supplement: Supplementary file 2 [file 25884021]

Archive with 53 entries (53 files):
- 1_D^D2_0271_cm-1.gif
- 1_D^D2_0283_cm-1.gif
- 1_D^D2_0309_cm-1.gif
- 1_D^D2_0351_cm-1.gif
- 1_D^D2_0355_cm-1.gif
- 1_D^D2_0403_cm-1.gif
- 1_D^D2_0415_cm-1.gif
- 1_D^D2_0421_cm-1.gif
- 1_D^D2_0445_cm-1.gif
- 1_D^D2_0456_cm-1.gif
- 1_D^D2_0472_cm-1.gif
- 1_D^D2_0536_cm-1.gif
- 1_D^D2_0595_cm-1.gif
- 1_D^D2_0613_cm-1.gif
- 1_D^D2_0781_cm-1.gif
- 1_D^D2_0784_cm-1.gif
- 1_D^D2_1278_cm-1.gif
- 1_D^D2_1375_cm-1.gif
- 1_D^D2_1927_cm-1.gif
- 1_D^N2_0354_cm-1.gif
- 1_D^N2_0552_cm-1.gif
- 1_D^N2_0626_cm-1.gif
- 1_D^N2_0645_cm-1.gif
- 1_D^N2_1376_cm-1.gif
- 1_D_0349_cm-1.gif
- 1_D_0449_cm-1.gif
- 1_D_0466_cm-1.gif
- 1_D_0564_cm-1.gif
- 1_D_1396_cm-1.gif
- 1_D_1410_cm-1.gif
- 1_H^H2_0384_cm-1.gif
- 1_H^H2_0572_cm-1.gif
- 1_H^H2_0586_cm-1.gif
- 1_H^H2_0602_cm-1.gif
- 1_H^H2_0730_cm-1.gif
- 1_H^H2_0731_cm-1.gif
- 1_H^H2_0732_cm-1.gif
- 1_H^H2_0821_cm-1.gif
- 1_H^H2_1048_cm-1.gif
- 1_H^H2_1053_cm-1.gif
- 1_H^H2_1781_cm-1.gif
- 1_H^H2_1914_cm-1.gif
- 1_H^H2_2721_cm-1.gif
- 1_H^N2_0671_cm-1.gif
- 1_H^N2_0691_cm-1.gif
- 1_H^N2_0696_cm-1.gif
- 1_H^N2_0821_cm-1.gif
- 1_H^N2_1915_cm-1.gif
- 1_H_0595_cm-1.gif
- 1_H_0604_cm-1.gif
- 1_H_0755_cm-1.gif
- 1_H_1947_cm-1.gif
- README.pdf
